# Supplementary material for: Optimization and Evaluation of the In Vitro Permeation Parameters of Topical Products with Non-Steroidal Anti-Inflammatory Drugs through Strat-M® Membrane
Source: MDPI journal article supplement (doi:10.3390/pharmaceutics13081305), 2021-08-20
Supplement: s1 [file s1]

# Supplementary Materials: Optimization and evaluation of the *in vitro* permeation parameters of topical products with non-steroidal anti-inflammatory drugs through Strat-M<sup>®</sup> membrane

Bartłomiej Milanowski, Hanna Wosicka-Frąckowiak, Eliza Głowska, Małgorzata Sosnowska, Stanisław Woźny, Filip Stachowiak, Angelika Suchenek and Dariusz Wilkowski

**Table S1.** The selected physicochemical and biological properties of the studied NSAIDs.

| Active pharmaceutical ingredient (API) | Structure / formula                                                                                                                                                  | Molar mass [g·mol <sup>-1</sup> ] | Log P (experimental; octanol / water)        | pK <sub>a</sub> at 25°C                            | Solubility in water at 25°C [mg L <sup>-1</sup> ] | IC 50 (COX-2) [μmol L <sup>-1</sup> ]                                   |
|----------------------------------------|----------------------------------------------------------------------------------------------------------------------------------------------------------------------|-----------------------------------|----------------------------------------------|----------------------------------------------------|---------------------------------------------------|-------------------------------------------------------------------------|
| Diclofenac                             | 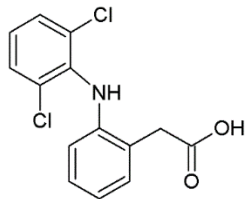<br>C <sub>14</sub> H <sub>11</sub> Cl <sub>2</sub> NO <sub>2</sub>                 | 296.1                             | 4.0 [1]<br>4.4 [2-5]<br>4.2 [6]<br>4.5 [7-9] | 3.80 [3,4,10]<br>4.18 [11]<br>4.0 [12]<br>4.50 [2] | 17.8 [1,10]<br>3.5 [12,13]                        | COX-1: 0.5, 0.3; COX-2: 0.038, 0.002 [14];<br>COX-2: 0.003 ± 0.001 [15] |
| Diclofenac sodium                      | <br>C <sub>14</sub> H <sub>10</sub> Cl <sub>2</sub> NO <sub>2</sub> Na             | 318.1                             | 0.7 [7,16]                                   |                                                    | 19 100 [17]<br>32 400 (37°C) [18]                 |                                                                         |
| Diclofenac diethylamine                | <br>C <sub>18</sub> H <sub>22</sub> Cl <sub>2</sub> N <sub>2</sub> O <sub>2</sub> | 369.3                             | 0.853 (octanol/buffer pH=7.4) [19]           |                                                    | 4 062.3 [10]<br>12 925.5 (20 °C) [10,20]          |                                                                         |

|                 |                                                                                                                |       |                                      |                                                            |                                                                                                                                                                                                                                                                                                                                                                                                                                                                                                                                                                              |                                                                           |
|-----------------|----------------------------------------------------------------------------------------------------------------|-------|--------------------------------------|------------------------------------------------------------|------------------------------------------------------------------------------------------------------------------------------------------------------------------------------------------------------------------------------------------------------------------------------------------------------------------------------------------------------------------------------------------------------------------------------------------------------------------------------------------------------------------------------------------------------------------------------|---------------------------------------------------------------------------|
| Ketoprofen      | 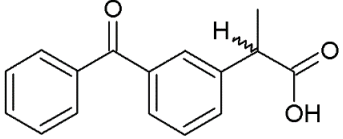<br><chem>C16H14O3</chem>     | 254.3 | 3.12 [2,4]<br>1.93 [21]<br>3.2 [22]  | 4.5 [23]<br>4.6 [2,4]<br>4.39, 4.45, 4.76 [22]             | 210 [24]<br>880 (37°C) [23]<br>10 (22-24 °C) [22,25]<br>253 (37°C) [22]                                                                                                                                                                                                                                                                                                                                                                                                                                                                                                      | COX-1: 61, 5.;<br>COX-2: 2.9,<br>0.24 [14];<br>COX-2: 0.74 ±<br>0.37 [15] |
| Naproxen        | <br><chem>C14H14O3</chem>     | 230.3 | 3.18 [4,25]<br>2.16 [21]<br>3.34 [2] | 4.2 [23,26]<br>4.6 [4]<br>4.15 [2]                         | 20 [24]<br>65.4 [27]<br>17 (ambient temperature) [28]<br>25 [29]                                                                                                                                                                                                                                                                                                                                                                                                                                                                                                             | COX-1: 3.0, 3.8;<br>COX-2: 28, 35<br>[14]                                 |
| Naproxen sodium | <br><chem>C14H13O3Na</chem>   | 252.1 |                                      |                                                            | 181 200 (22.9 °C) [30]<br>200 000 [31]                                                                                                                                                                                                                                                                                                                                                                                                                                                                                                                                       |                                                                           |
| Ibuprofen       | <br><chem>C13H18O2</chem>     | 206.3 | 3.50 [2,4]<br>2.41 [21]              | 5.3 [23]<br>4.55 [4]<br>5.20 [2]                           | 100 [23]                                                                                                                                                                                                                                                                                                                                                                                                                                                                                                                                                                     | COX-1: 0.9, 2.6;<br>COX-2: 7.2, 20<br>[14]                                |
| Etofenamate     | <br><chem>C18H18F3NO4</chem> | 369.3 | about 5 [32]                         | pKa1=6; pKa2=7<br>[33]<br>Flufenamic acid:<br>about 4 [32] | Etofenamate is sparingly soluble in aqueous buffers (water solubility = 9.36 mg/L based on information at <a href="https://www.drugbank.ca/drugs/DB08984">https://www.drugbank.ca/drugs/DB08984</a> ). For maximum solubility in aqueous buffers, etofenamate should be dissolved in alcohol and then diluted with the aqueous buffer of choice. Etofenamate has a solubility of approximately 100 mg/L in a 1:5 solution of ethanol : PBS (pH=7.2) using this method ( <a href="https://www.caymanchem.com/pdfs/23674.pdf">https://www.caymanchem.com/pdfs/23674.pdf</a> ). | Flufenamic acid:<br>COX-1: 3.1;<br>COX-2: 9.3<br>[14]                     |

**Table S2.** UHPLC method parameters: sample injection volumes, retention times, and NSAIDs analytical wavelengths.

| API               | Injection volume [ $\mu$ L] | Retention time [min] | Analytical wavelength [nm] |
|-------------------|-----------------------------|----------------------|----------------------------|
| Diclofenac sodium | 1.0                         | 1.9                  | 276                        |
| Etofenamate       | 0.5 (gel and spray)         | 2.8                  | 286                        |
| Ibuprofen         | 2.0                         | 2.0                  | 229                        |
| Ketoprofen        | 1.0 (gel) and 0.5 (spray)   | 1.0                  | 227                        |
| Naproxen          | 2.0                         | 1.5                  | 330                        |

**Table S3.** The permeation test results of topical diclofenac medications and HPLC methods for its quantification in receptor fluids.

| API                               | Formulation                                                                                                                   | Penetration studies                                                                                                                                                                                                                                                        | HPLC assay                                                                                                                                                                                                                                                                    | References |
|-----------------------------------|-------------------------------------------------------------------------------------------------------------------------------|----------------------------------------------------------------------------------------------------------------------------------------------------------------------------------------------------------------------------------------------------------------------------|-------------------------------------------------------------------------------------------------------------------------------------------------------------------------------------------------------------------------------------------------------------------------------|------------|
| Diclofenac sodium                 | Carbopol® 940 gel,<br><br>o/w microemulsion, Voltaren Emulgel                                                                 | Franz diffusion cells<br>PS: 1.76 cm <sup>2</sup> ; MT: Swiss albino rats skin;<br>RF: 20 mL of phosphate buffer (pH 7.4) ; TEMP: 37°C<br>SW: 1 g; RFA: 0.7 mL; TT: 8h; 600 rpm                                                                                            | ---                                                                                                                                                                                                                                                                           | [17]       |
| Diclofenac epolamine              | microemulsion, Poloxamer Microemulsion based gel, Flector® gel                                                                | Franz diffusion cells<br>PS: 4.9 cm <sup>2</sup> ; MT: rat skin; RF: 300 mL phosphate buffer (pH 7.4) ;<br>TEMP: 37°C;<br>SW: 1.0 g (1.3%); RFA: 4.0 mL; TT: 8h; 600 rpm                                                                                                   | ---<br>AW: UV 276 nm                                                                                                                                                                                                                                                          | [34]       |
| Diclofenac sodium                 | laminated adhesive diclofenac containing patches (including capsaicin and hyoscyamine) or only with capsaicin and hyoscyamine | Franz diffusion cells<br>PS: 10.0 cm <sup>2</sup> ; MT: rat skin; RF: PEG 300 solution in water (1:4);<br>TEMP: 37°C; SW: ---; RFA: 0.6 mL; TT: 24 or 48h<br><br>0.1 ml of IS solution was added to the samples before injection onto the column                           | Glass column Separon SGX C-18 (150_3.3 mm I.D., 7 mm) (Tessek, Prague).<br>MP: methanol:phosphate buffer pH 6.5 (110:100) with an addition of tetrabutylammonium iodide (5 mM:l), FR: 0.5 ml/min, AW: 284 nm<br>RT: ~3.5 min                                                  | [35]       |
| Ionized and nonionized diclofenac | suspension or solutions in McIlvaine buffer/ethanol (0-40%)                                                                   | Franz diffusion cells<br>PS: 0.785 cm <sup>2</sup> ; MT: rat skin; RF: 3 mL phosphate buffer (pH 7.2) (10-fold of solubility); TEMP: 37°C; SV: 3 mL; RFA: 0.02 mL; TT: 8h                                                                                                  | HPLC apparatus (Model 655, Hitachi Ltd) equipped with a variable wavelength UV monitor.<br>Column: YMC Packed A-302 S-5 120A ODS 4.6 X 1.50 mm (Yamamura Chemical Laboratories Co., Ltd).<br>MP: 0.1% aqueous phosphoric acid-methanol (1: 4 v/v), FR: 1.0 ml/min, AW: 283 nm | [36]       |
| Diclofenac potassium              | tablets                                                                                                                       | ---                                                                                                                                                                                                                                                                        | Phenomenex LUNA C18 (25 cm x 4.6 mm i.d., 5 µ) column MP: acetonitrile: sodium dihydrogen orthophosphate (adjusted to pH 3.5 using orthophosphoric acid) in the ratio of 70:30 v/v,<br>FR: 1.0 mL/min, AW: 278 nm, RT: 9.4 min                                                | [37]       |
| Diclofenac sodium                 | propylene glycol, water, ethanol (saturated or unsaturated solution)                                                          | PAMPA plate<br>PS: 280µl cm <sup>2</sup> ; MT: Strat-M™; RF: 280µl Krebs–Ringer bicarbonate buffer spiked with dextrose (Sigma–Aldrich, St. Louis, MO) and bovine serum albumin (4.5%, w/v; Fisher Scientific, Fair Lawn, NJ) ; TEMP: 37°C; SV: --- ; RFA: 0.02 mL; TT: 5h | ---                                                                                                                                                                                                                                                                           | [38]       |
| Diclofenac sodium                 | suppositories                                                                                                                 | ---                                                                                                                                                                                                                                                                        | Lichrospher 100 RP 18 (5 µm, 25 × 4 cm; Merck). MP: methanol and phosphate buffer pH 2.5 (76:24, v/v),<br>FR: 1.0 mL/min, AW: 254 nm, RT: ~7 min                                                                                                                              | [39]       |
| Diclofenac sodium                 | tablets                                                                                                                       | ---                                                                                                                                                                                                                                                                        | Zorbax SB n C 18 column 150 × 4.6 mm<br>MP: methanol and water (60:40, v/v), FR: 1 mL/min, AW: 248 nm, RT: 2.73 min                                                                                                                                                           | [40]       |
| Diclofenac                        | ---                                                                                                                           | ---                                                                                                                                                                                                                                                                        | C-18 analytical reversed phase column (250mm×4.6mm i.d., 5µM particle size, Beckman, Palo Alto, CA, USA) MP: acetonitrile: sodium acetate buffer (75 mM, pH adjusted to 5.0 with acetic acid) in a ratio of 2:1.5 (v/v), FR: 0.5 ml/min, AW: 280 nm, RT: 16.2 min             | [41]       |

Diclofenac  
diethylamine

nanoemulsion gel

---

Hypersil BDS-5 mm, RP-C8 column (250mm×4.6 mm, Thermo Scientific), MP: [42]  
methanol and water (70:30 v/v) pH = 3.0±0.5  
FR: 1 mL/min, AW: 280 nm, RT: 9.5 min

---

PS – Penetration Surface; MT – Membrane Type; RF – receptor Fluid; SW – Sample Weight; SV – Sample Volume; RFA – receptor Fluid Aliquot; TT – Total Time; MP – Mobile Phase; FR - Flow Rate; AW – Analytical Wavelength; RT – Retention Time

**Table S4.** The permeation test results of topical ketoprofen medications and HPLC methods for its quantification in receptor fluids.

| API        | Formulation                                                   |          |                                    | Penetration studies                                                                                                                                                               | HPLC assay                                                                                                                                                                             | References |
|------------|---------------------------------------------------------------|----------|------------------------------------|-----------------------------------------------------------------------------------------------------------------------------------------------------------------------------------|----------------------------------------------------------------------------------------------------------------------------------------------------------------------------------------|------------|
| Ketoprofen | adhesive                                                      | TDDs     | (transdermal drug delivery system) | Modified Franz diffusion cells<br>PS: 0.951 cm <sup>2</sup> ; MT: cellophane membrane; RF: phosphate buffer (pH 7.4); TEMP: 32°C; SV: ---; RFA: 1.0 mL; TT: 7h;                   | ---                                                                                                                                                                                    | [43]       |
| Ketoprofen | isopropyl myristate solution                                  |          |                                    | ---                                                                                                                                                                               | Phenomenex Luna C18 5µm column (250x4.6 mm) with a Luna 5-µm guard Column (30x4.6 mm)<br>MP: acetonitrile-methanol-water (36:54:10, v/v/v),<br>FR: 1.2 mL/min, RT: 2.3 min, AW: 265 nm | [44]       |
| Ketoprofen | sodium alginate gel (2.5%)                                    |          |                                    | Franz diffusion cells<br>PS: 2.5 cm <sup>2</sup> ; MT: regenerated cellulose, Strat-M™; RF: phosphate buffer (pH 5.6 and 7.4) 125.0 mL; TEMP: 37°C; SW: 5.0 g; RFA: ---; TT: 24h; | ---                                                                                                                                                                                    | [45]       |
| Ketoprofen | KP-TDDS                                                       |          |                                    | Franz diffusion cells<br>PS: 1.7679 cm <sup>2</sup> ; MT: full thickness rat skin; RF: phosphate buffer (pH 7.4) 12.0 mL; TEMP: 32°C; SW: ---; RFA: 500 µl; TT: 30h;              | Nucleosil 100–5 C18 column (5 µm, 250x4.6mm)<br>temp. = 40°C, MP: acetonitrile/pH 3.5 phosphate buffer mixture (55:45 v/v), FR: 1.0 ml/min, RT: 2.73 min, AW: 254 nm                   | [46]       |
| Ketoprofen | benzyl alcohol / ethanol / Solutol®HS 15 / water nanoemulsion |          |                                    | Franz diffusion cells<br>PS: 1.77 cm <sup>2</sup> ; MT: mouse skin; RF: phosphate buffer (pH 7.4) 11.5 mL; TEMP: 37°C; SV: 2 mL; RFA: 0.2 mL; TT: 24h;                            | ODS column (Tosoh, Tskgel ODS-80TS, 4.6 mm i.d × 150 mm)<br>MP: acetonitrile and pH 7.4 phosphate buffer (78:22 v/v),<br>FR: 1 mL/min, RT: ---, AW: 258 nm                             | [47]       |
| Ketoprofen | Cremophor microemulsions                                      | RH40-PEG | 400                                | Franz diffusion cells<br>PS: 2.31 cm <sup>2</sup> ; MT: shed snake skin; RF: phosphate buffer (pH 7.4) PBS 6.0 mL; TEMP: 32°C; SV: ---; RFA: 1.0 mL; TT: 12h                      | C18 column (Waters, USA, particle size = 5µm; column dimension = 4.6 × 150 mm)<br>FR: 1 ml/min, MP: 0.1% (v/v) phosphoric acid: methanol (25:75, v/v), AW: 254 nm                      | [48]       |

PS – Penetration Surface; MT – Membrane Type; RF – Receptor Fluid; SW – Sample Weight; SV – sample volume; RFA – Receptor Fluid Aliquot; TT – Total Time; MP – Mobile Phase; FR – Flow Rate; AW – Analytical Wavelength; RT – Retention Time

**Table S5.** The permeation test results of topical naproxen medications and HPLC methods for its quantification in receptor fluids.

| API             | Formulation                                              | Penetration studies                                                                                                                                                                    | HPLC assay                                                                                                                                                      | References |
|-----------------|----------------------------------------------------------|----------------------------------------------------------------------------------------------------------------------------------------------------------------------------------------|-----------------------------------------------------------------------------------------------------------------------------------------------------------------|------------|
| Naproxen        | solution and commercial gels: Reuxen, Tecnifar, Naprosyn | Franz diffusion cells<br>PS: 1.0 cm <sup>2</sup> ; MT: cellulose acetate and polyethersulphon; RF: phosphate buffer (pH 7.4) PBS 4.0 mL; TEMP: 32°C; SW: 1 g; RFA: 0.1-1.0 mL; TT: 24h | ---                                                                                                                                                             | [49]       |
| Naproxen sodium | tablets                                                  | ---                                                                                                                                                                                    | RP -UFLC<br>C18G column (250 × 4.6mm i.d., 5µm)<br>MP: methanol:10mM tetra butyl ammonium hydrogen sulfate (80:20, v/v), FR: 1.2mL/min, RT: 4.5 min, AW: 231 nm | [50]       |
| Naproxen        | microemulsions                                           | Franz diffusion cells<br>PS: 3.4618 cm <sup>2</sup> ; MT: cellulose membrane; RF: phosphate buffer (pH 7.4) 25.0 mL; TEMP: 32°C; SW: 5 g; RFA: 2.0 mL; TT: 24h                         | AW: 271 nm                                                                                                                                                      | [51]       |
| Naproxen        | solid lipid nanoparticles                                | Franz diffusion cells<br>PS: 3.4618 cm <sup>2</sup> ; MT: rat skin; RF: 50:50 ethanol/water mixture (5.5 mL); TEMP: 37°C; SV: 10 mL; RFA: ---; TT: 24h                                 | Agilent Eclipse XDB-C18 column (5µm, 4.6 × 250 mm)<br>MP: 40:20:40 acetonitrile, methanol and acetic acid (1% v/v), FR: 0.7 ml/min, RT: 11 min, AW: 230 nm      | [52]       |
| Naproxen        | o/w microemulsions                                       | Franz diffusion cells<br>PS: 0.75 cm <sup>2</sup> ; MT: cellulose membrane; RF: 50:50 ethanol/water mixture (4.5 mL); TEMP: 35°C; SV: 500 µl; RFA: 200 µl; TT: 22h                     | Waters Symmetry, 4.6 × 15 cm reverse phase column (C18).<br>MP: methanol/phosphate buffer pH 2.5 (65:35 v/v), FR: 1 ml/min, AW: 274 nm, RT: ---                 | [53]       |

PS – Penetration Surface; MT – Membrane Type; RF – Receptor Fluid; SW – Sample Weight; SV – sample volume; RFA – Receptor Fluid Aliquot; TT – Total Time; MP – Mobile Phase; FR - Flow Rate; AW – Analytical Wavelength; RT – Retention Time

**Table S6.** The permeation test results of topical ibuprofen medications and HPLC methods for its quantification in receptor fluids.

| API                                     | Formulation             | Penetration studies                                                                                                                                                                                                                               | HPLC assay                                                                                                                                                                                                                                                  | References |
|-----------------------------------------|-------------------------|---------------------------------------------------------------------------------------------------------------------------------------------------------------------------------------------------------------------------------------------------|-------------------------------------------------------------------------------------------------------------------------------------------------------------------------------------------------------------------------------------------------------------|------------|
| Ibuprofen                               | methanol solution       | ---                                                                                                                                                                                                                                               | Rainin Microsorb 3 $\mu$ m; 10 $\times$ 4.6 mm reverse phase column (C18)<br>MP: acetonitrile, 0.1 M sodium acetate (35:65 v/v; glacial acetic acid added to obtain pH=6.4), FR: 1.5 ml/min<br>AW: 220 nm, RT: 4.0 min, Temp.: 50°C                         | [54]       |
| Ibuprofen                               | ointment                | ---                                                                                                                                                                                                                                               | Precolumn: Pye Unicam RP-18, 10 $\mu$ m; 4.6 $\times$ 30 mm<br>Analytical column: Pye Unicam RP-18, 10 $\mu$ m; 4.6 $\times$ 100 mm<br>MP: THF, 0.2M NaH <sub>2</sub> PO <sub>4</sub> (45:55, v/v; pH=4), FR: 1.0 ml/min, AW: 219 nm, RT: 6.6 min, Temp.: - | [55]       |
| Ibuprofen                               | gel                     | Franz diffusion cells<br>PS: 1.131 cm <sup>2</sup> ; MT: synthetic hydrophilic GH Polypro filter, pore size: 0.45nm;<br>RF: phosphate buffer, pH=7.4 (6.5 mL); TEMP: 32°C; S: 1g; RFA: 500 $\mu$ l; TT: 8h                                        | C18 column, 5 $\mu$ m; 3.9 $\times$ 150 mm<br>MP: acetonitrile, 0.01M H <sub>3</sub> PO <sub>4</sub> (45:55, v/v), FR: 1.0 ml/min, AW: 264 nm, RT: 7.129 min, Temp.: -                                                                                      | [56]       |
| Ibuprofen                               | gel                     | Franz diffusion cells<br>PS: 1.00 cm <sup>2</sup> ; MT: excised porcine abdominal skin; RF: phosphate buffer, pH=7.4 (8.0 mL); TEMP: 32.0 $\pm$ 0.5°C; S: -; RFA: 200 $\mu$ l; TT: 8h                                                             | HyperClone reverse phase C18 column, 5 $\mu$ m; 4.6 $\times$ 250 mm<br>MP: acetonitrile, phosphate buffer pH=7.4 (gradient; 30:70, 10 min), FR: 1.0 ml/min, AW: 233 nm, RT: -, Temp.: -                                                                     | [57]       |
| Ibuprofen                               | gel                     | Vertical diffusion cells<br>PS: about 2 cm <sup>2</sup> ; MT: silicone membrane (Silatos 120 $\mu$ m thickness), pig ear skin; RF: phosphate-buffered saline pH=7.4 67mM (6.5 mL); TEMP: 37°C; S: -; RFA: 200 $\mu$ l; TT: 8h                     | Merck Lichrospher100 RP18, 5 $\mu$ m<br>MP: acetonitrile, citrate buffer pH=2.4 (55:45 v/v), FR: 1.2 ml/min, AW: 227 nm<br>RT: about 5 min, Temp.: -                                                                                                        | [58]       |
| Ibuprofen                               | microemulsion           | Franz diffusion cells<br>PS: 2.8 cm <sup>2</sup> ; MT: porcine ear skin; RF: phosphate-buffered saline pH=7.4 (7.0 mL); TEMP: 37°C; S: 1.0 g; RFA: 500 $\mu$ l; TT: 8h                                                                            | Merck Lichrospher C18, 5 $\mu$ m; 4. 6 $\times$ 250 mm<br>MP: acetonitrile, sodium acetate buffer pH=2.5 (70:30 v/v), FR: 0.8 ml/min, AW: 264 nm, RT: about 7.5 min, Temp.: -                                                                               | [59]       |
| Ibuprofen, acetaminophen, chlorzoxazone | tablets                 | ---                                                                                                                                                                                                                                               | Kromasil C8, 5 $\mu$ m; 4. 6 $\times$ 250 mm<br>MP: acetonitrile, 0.2% trimethylamine solution (pH=3.2 obtained with H <sub>3</sub> PO <sub>4</sub> ) (50:50 v/v), FR: 1.5 ml/min, AW: 215 nm, RT: about 12 min, Temp.: 20 $\pm$ 1°C                        | [60]       |
| Ibuprofen                               | spray, gel, cream, foam | Franz diffusion cells<br>PS: 1.15 cm <sup>2</sup> ; MT: human skin; RF: phosphate-buffered saline pH=7.4, ethanol (75:25, v/v) (2.5 mL); TEMP: 37.0 $\pm$ 0.5°C; S: 5mg/cm <sup>2</sup> ; RFA: 200 $\mu$ l; TT: 48h                               | RP Apex ODS column; 4. 6 $\times$ 250 mm<br>MP: acetonitrile, buffer (60:40, pH=2.5), FR: 1.5 ml/min, AW: 225 nm, RT: -, Temp.: -                                                                                                                           | [61]       |
| Ibuprofen                               | gel                     | Franz diffusion cells<br>PS: 0.64 cm <sup>2</sup> ; MT: hairless mouse skin; RF: isotonic phosphate buffer pH=7.2 with 0.1% (v/v) formaldehyde and 0.5% (w/v) Brij 58 (5.1 mL); TEMP: 37.0 $\pm$ 0.5°C; S: 200 $\mu$ l; RFA: 300 $\mu$ l; TT: 24h | Reverse phase C18 column, 5 $\mu$ m; 4. 6 $\times$ 150 mm<br>MP: acetonitrile, monobasic sodium phosphate buffer pH=3 (60:40), FR: 1.0 ml/min, AW: 254 nm, RT: 3.8 min, Temp.: -                                                                            | [62]       |

PS – Penetration Surface; MT – Membrane Type; RF – Receptor Fluid; S – Sample Amount; RFA – Receptor Fluid Aliquot; TT – Total Time; MP – Mobile Phase; FR – Flow Rate; AW – Analytical Wavelength; RT – Retention Time



**Table S7.** The permeation test results of topical etofenamate medications and HPLC methods for its quantification in receptor fluids.

| API         | Formulation                               | Penetration studies                                                                                                                                                                                                            | HPLC assay                                                                                                                                                                                                                                            | References |
|-------------|-------------------------------------------|--------------------------------------------------------------------------------------------------------------------------------------------------------------------------------------------------------------------------------|-------------------------------------------------------------------------------------------------------------------------------------------------------------------------------------------------------------------------------------------------------|------------|
| Etofenamate | solution in mobile phase                  | ---                                                                                                                                                                                                                            | Qualisil Gold C18 column, 5 $\mu$ m; 4.6 $\times$ 250 mm<br>MP: methanol, 0.2% triethylamine in water (v/v) at 85:15 ratio (v/v) (pH adjusted to 6.5 with 10% v/v H <sub>3</sub> PO <sub>4</sub> ), FR: 1.2 ml/min, AW: 286 nm, RT: 5.3 min, Temp.: - | [33]       |
| Etofenamate | drug solutions                            | ---                                                                                                                                                                                                                            | Qualisil BDS C18 column, 5 $\mu$ m; 4.6 $\times$ 250 mm<br>MP: methanol, phosphate buffer (80:20, v/v) (pH adjusted to 6.0 with H <sub>3</sub> PO <sub>4</sub> ), FR: 1.0 ml/min, AW: 286 nm, RT: 7.5 min, Temp.: -                                   | [63]       |
| Etofenamate | plasma, synovial fluid and tissue samples | ---                                                                                                                                                                                                                            | Nucleosil 7 C18 column, 5 $\mu$ m; 4.0 $\times$ 250 mm<br>MP: -, FR: 1.0 ml/min, AW: 286 nm, RT: about 15 min, Temp.: -                                                                                                                               | [64]       |
| Etofenamate | gel                                       | Franz diffusion cells<br>PS: 1 cm <sup>2</sup> ; MT: hydrophilic polysulfone filters, human abdominal skin; RF: ethanol, phosphate buffer pH=7.4 (2:3, v/v); TEMP: 32 $\pm$ 2°C; SW: 0.2 $\pm$ 0.1g; RFA: 200 $\mu$ l; TT: 12h | Reversed phase Lichrospher 100 RP18 column, 5 $\mu$ m; 4.0 $\times$ 125 mm<br>MP: methanol, acetonitrile, water (45:35:20, v/v/v), FR: 1.0 ml/min, AW: 286 nm, RT: -, Temp.: -                                                                        | [65]       |

PS – Penetration Surface; MT – Membrane Type; RF – Receptor Fluid; SW – Sample Weight; RFA – Receptor Fluid Aliquot; TT – Total Time; MP – Mobile Phase;

FR - Flow Rate; AW – Analytical Wavelength; RT – Retention Time

**Table S8.** The validation parameters for the assays of NSAIDs by the UHPLC-UV method.

| Parameter                                          | Diclofenac sodium | Etofenamate | Ibuprofen | Ketoprofen | Naproxen   |
|----------------------------------------------------|-------------------|-------------|-----------|------------|------------|
| Specificity <sup>a</sup>                           | ✓                 | ✓           | ✓         | ✓          | ✓          |
| Linearity range <sup>b</sup> [mg/mL]               | 0.22-1.00         | 0.83-4.11   | 0.20-0.65 | 0.12-0.43  | 0.35-1.78  |
| Slope                                              | 5253215           | 2960365     | 1803474   | 9451898    | 1753264    |
| Intercept                                          | 27620             | -207535     | 96769     | 21058      | 17550      |
| Correlation coefficient (r)                        | 0.997             | 0.998       | 0.995     | 0.995      | 0.999      |
| SE of slope                                        | 106529            | 55011       | 49399     | 249923     | 11159      |
| SE of intercept                                    | 70805             | 149930      | 21420     | 70864      | 13151      |
| LOD [mg/mL]                                        | 0.07              | 0.28        | 0.06      | 0.04       | 0.04       |
| LOQ [mg/mL]                                        | 0.22              | 0.83        | 0.20      | 0.12       | 0.12       |
| Stability of API in standard solution <sup>c</sup> | >12h              | >12h        | >12h      | >12h       | >12h       |
| System suitability <sup>d</sup> [%]                | 0.28              | 0.30        | 0.21      | 0.21       | 0.21       |
| Interday precision <sup>e</sup> [%]                | 0.39              | 1.75        | 1.10      | 1.74       | 0.50       |
| Intraday precision <sup>f</sup> [%]                | 0.90              | 2.44        | 1.27      | 2.28       | 1.24       |
| Accuracy (recovery) <sup>g</sup> [%]               | 100.4±3.8         | 100.8±3.9   | 98.7±7.0  | 99.7±5.2   | 99.86±2.01 |

<sup>a</sup> the medium and placebo must not interfere with the determination of active substances,

<sup>b</sup> 5 relative concentrations of the solution (25 – 125% for each API,  $y=ax+b$ ,  $r \geq 0.995$ , slope (a) – significant, intercept (b) – irrelevant),

<sup>c</sup> the relative difference in peak surface area values for the standard and test solution immediately after preparation and after "t" from preparation should not be greater than 2% ( $RSD \leq 2\%$ ),

<sup>d</sup> based on 6 injections of standard solution with concentration corresponding to 100% of API ( $RSD$  standard for  $n=6 \leq 2\%$ ),

<sup>e</sup> based on analysis of 6 samples of standard solution with concentration corresponding to 100% of API from 1 Vertical Diffusion Cell ( $RSD$  for one group of results  $\leq 5\%$ ),

<sup>f</sup> based on 2 groups of results done by 2 analysts, where one group of results is based on analysis of 6 samples of standard solution with concentration corresponding to 100% of API from 1 Vertical Diffusion Cell by 1 analyst ( $RSD$  for one group of results  $\leq 2\%$ , the relative difference between means  $\leq 5\%$ , coefficient  $F_{calc} < F_{crit}$  ( $F_{crit}=5.05$ )),

<sup>g</sup> 5 relative concentrations of the solution (25 – 125% for each API, the average recovery value must be in the range of 95 - 105%, each result must fall within the specified confidence interval (average recovery value  $\pm 2SD$ )).

## References

1. Fini, A.; Fazio, G.; Gonzalez-Rodriguez, M.; Cavallari, C.; Passerini, N.; Rodriguez, L. Formation of ion-pairs in aqueous solutions of diclofenac salts. *Int J Pharm* **1999**, *187*, 163-173, doi:10.1016/s0378-5173(99)00180-5.
2. Barbato, F.; La Rotonda, M.I.; Quaglia, F. Interactions of non-steroidal anti-inflammatory drugs with phospholipids: comparison between octanol/buffer partition coefficients and chromatographic indexes on immobilized artificial membranes. *J Pharm Sci* **1997**, *86*, 225-229, doi:10.1021/js960233h.
3. Chuasuwan, B.; Binjesoh, V.; Polli, J.E.; Zhang, H.; Amidon, G.L.; Junginger, H.E.; Midha, K.K.; Shah, V.P.; Stavchansky, S.; Dressman, J.B., et al. Biowaiver monographs for immediate release solid oral dosage forms: diclofenac sodium and diclofenac potassium. *J Pharm Sci* **2009**, *98*, 1206-1219, doi:10.1002/jps.21525.
4. Fini, A. Solubility and solubilization properties of non-steroidal anti-inflammatory drugs. *International Journal of Pharmaceutics* **1995**, *126*, 95-102, doi:10.1016/0378-5173(95)04102-8.
5. Hallare, A.V.; Kohler, H.R.; Triebkorn, R. Developmental toxicity and stress protein responses in zebrafish embryos after exposure to diclofenac and its solvent, DMSO. *Chemosphere* **2004**, *56*, 659-666, doi:10.1016/j.chemosphere.2004.04.007.
6. Sintov, A.C. Cumulative evidence of the low reliability of frozen/thawed pig skin as a model for in vitro percutaneous permeation testing. *Eur J Pharm Sci* **2017**, *102*, 261-263, doi:10.1016/j.ejps.2017.03.024.
7. Balon, K.; Riebeschl, B.U.; Muller, B.W. Determination of liposome partitioning of ionizable drugs by titration. *J Pharm Sci* **1999**, *88*, 802-806, doi:10.1021/js9804213.
8. Ghosh, P.; Lee, D.; Kim, K.B.; Stinchcomb, A.L. Optimization of naltrexone diclofenac codrugs for sustained drug delivery across microneedle-treated skin. *Pharm Res* **2014**, *31*, 148-159, doi:10.1007/s11095-013-1147-8.
9. Rubbens, J.; Mols, R.; Brouwers, J.; Augustijns, P. Exploring gastric drug absorption in fasted and fed state rats. *Int J Pharm* **2018**, *548*, 636-641, doi:10.1016/j.ijpharm.2018.07.017.
10. O'Connor, K.M.; Corrigan, O.I. Comparison of the physicochemical properties of the N-(2-hydroxyethyl) pyrrolidine, diethylamine and sodium salt forms of diclofenac. *Int J Pharm* **2001**, *222*, 281-293, doi:10.1016/S0378-5173(01)00717-7 [pii].
11. Andreetta, A.; Verde, C.; Babusci, M.; Muller, R.; Simpson, M.I.; Landoni, M.F. Comparison of Diclofenac Diethylamine Permeation Across Horse Skin from Five Commercial Medical Human Formulations. *Journal of Equine Veterinary Science* **2011**, *31*, 502-505, doi:10.1016/j.jevs.2011.03.011.
12. Cordero, J.A.; Alarcon, L.; Escibano, E.; Obach, R.; Domenech, J. A comparative study of the transdermal penetration of a series of non-steroidal anti-inflammatory drugs. *J Pharm Sci* **1997**, *86*, 503-508, doi:10.1021/js950346l.
13. Hadgraft, J.; du Plessis, J.; Goosen, C. The selection of non-steroidal anti-inflammatory agents for dermal delivery. *Int J Pharm* **2000**, *207*, 31-37, doi:10.1016/s0378-5173(00)00517-2.
14. Warner, T.D.; Giuliano, F.; Vojnovic, I.; Bukasa, A.; Mitchell, J.A.; Vane, J.R. Nonsteroid drug selectivities for cyclo-oxygenase-1 rather than cyclo-oxygenase-2 are associated with human gastrointestinal toxicity: A full *in vitro* analysis. *Proceedings of the National Academy of Sciences* **1999**, *96*, 7563-7568, doi:10.1073/pnas.96.13.7563.
15. Cordero, J.A.; Camacho, M.; Obach, R.; Domenech, J.; Vila, L. In vitro based index of topical anti-inflammatory activity to compare a series of NSAIDs. *European Journal of Pharmaceutics and Biopharmaceutics* **2001**, *51*, 135-142, doi:https://doi.org/10.1016/S0939-6411(00)00149-1.
16. Nii, T.; Ishii, F. Encapsulation efficiency of water-soluble and insoluble drugs in liposomes prepared by the microencapsulation vesicle method. *Int J Pharm* **2005**, *298*, 198-205, doi:10.1016/j.ijpharm.2005.04.029.
17. Sarigullu Ozguney, I.; Yesim Karasulu, H.; Kantarci, G.; Sozer, S.; Guneri, T.; Ertan, G. Transdermal delivery of diclofenac sodium through rat skin from various formulations. *AAPS PharmSciTech* **2006**, *7*, 88, doi:10.1208/pt070488.
18. Okumura, M.; Sugibayashi, K.; Ogawa, K.; Morimoto, Y. Skin permeability of water-soluble drugs. *Chem Pharm Bull (Tokyo)* **1989**, *37*, 1404-1406, doi:10.1248/cpb.37.1404.
19. Arora, P.; Mukherjee, B. Design, development, physicochemical, and in vitro and in vivo evaluation of transdermal patches containing diclofenac diethylammonium salt. *J Pharm Sci* **2002**, *91*, 2076-2089, doi:10.1002/jps.10200.
20. Kriwet, K.; Müller-Goymann, C.C. Diclofenac release from phospholipid drug systems and permeation through excised human stratum corneum. *International Journal of Pharmaceutics* **1995**, *125*, 231-242, doi:10.1016/0378-5173(95)00130-b.
21. Mura, P. Interactions of ketoprofen and ibuprofen with  $\beta$ -cyclodextrins in solution and in the solid state. *International Journal of Pharmaceutics* **1998**, *166*, 189-203, doi:10.1016/s0378-5173(98)00035-0.
22. Shohin, I.E.; Kulinich, J.I.; Ramenskaya, G.V.; Abrahamsson, B.; Kopp, S.; Langguth, P.; Polli, J.E.; Shah, V.P.; Groot, D.W.; Barends, D.M., et al. Biowaiver monographs for immediate-release solid oral dosage forms: ketoprofen. *J Pharm Sci* **2012**, *101*, 3593-3603, doi:10.1002/jps.23233.

23. Yiyun, C.; Tongwen, X. Dendrimers as potential drug carriers. Part I. Solubilization of non-steroidal anti-inflammatory drugs in the presence of polyamidoamine dendrimers. *Eur J Med Chem* **2005**, *40*, 1188-1192, doi:10.1016/j.ejmech.2005.06.010.
24. Ahmed, I.S.; Nafadi, M.M.; Fatahalla, F.A. Formulation of a fast-dissolving ketoprofen tablet using freeze-drying in blisters technique. *Drug Dev Ind Pharm* **2006**, *32*, 437-442, doi:10.1080/03639040500528913.
25. Meza, C.P.; Santos, M.A.; Romañach, R.J. Quantitation of drug content in a low dosage formulation by transmission near infrared spectroscopy. *AAPS PharmSciTech* **2017**, *7*, E206-E214, doi:10.1208/pt070129.
26. Bhise, K.S.; Dhumal, R.S.; Paradkar, A.R.; Kadam, S.S. Effect of drying methods on swelling, erosion and drug release from chitosan-naproxen sodium complexes. *AAPS PharmSciTech* **2008**, *9*, 1-12, doi:10.1208/s12249-007-9001-0.
27. Pacheco, D.P.; Martínez, F. Thermodynamic analysis of the solubility of naproxen in ethanol + water cosolvent mixtures. *Physics and Chemistry of Liquids* **2007**, *45*, 581-595, doi:10.1080/00319100701313862.
28. Tiong, N.; Elkordy, A.A. Effects of liquisolid formulations on dissolution of naproxen. *Eur J Pharm Biopharm* **2009**, *73*, 373-384, doi:10.1016/j.ejpb.2009.08.002.
29. Mura, P.; Faucci, M.T.; Bettinetti, G.P. The influence of polyvinylpyrrolidone on naproxen complexation with hydroxypropyl- $\beta$ -cyclodextrin. *European Journal of Pharmaceutical Sciences* **2001**, *13*, 187-194, doi:10.1016/s0928-0987(01)00093-8.
30. Chavez, K.J.; Rousseau, R.W. Solubility and Pseudopolymorphic Transitions in Mixed Solvents: Sodium Naproxen in Methanol–Water and Ethanol–Water Solutions. *Crystal Growth & Design* **2010**, *10*, 3802-3807, doi:10.1021/cg1006956.
31. Kim, Y.S.; Mendez del Rio, J.R.; Rousseau, R.W. Solubility and prediction of the heat of solution of sodium naproxen in aqueous solutions. *J Pharm Sci* **2005**, *94*, 1941-1948, doi:10.1002/jps.20391.
32. Graham, G.G. Fenamates. In *Compendium of Inflammatory Diseases*, Parnham, M.J., Ed. Springer Basel: Basel, 2016; 10.1007/978-3-7643-8550-7\_24pp. 477-482.
33. Peraman, R.; Bhadraya, K.; Reddy, Y.P.; Reddy, C.S.; Lokesh, T. Analytical Quality by Design Approach in RP-HPLC Method Development for the Assay of Etofenamate in Dosage Forms. *Indian J Pharm Sci* **2015**, *77*, 751-757, doi:10.4103/0250-474x.174971.
34. Fouad, S.A.; Basalious, E.B.; El-Nabarawi, M.A.; Tayel, S.A. Microemulsion and poloxamer microemulsion-based gel for sustained transdermal delivery of diclofenac epolamine using in-skin drug depot: in vitro/in vivo evaluation. *Int J Pharm* **2013**, *453*, 569-578, doi:10.1016/j.ijpharm.2013.06.009.
35. Klimes, J.; Sochor, J.; Dolezal, P.; Korner, J. HPLC evaluation of diclofenac in transdermal therapeutic preparations. *Int J Pharm* **2001**, *217*, 153-160, doi:10.1016/s0378-5173(01)00594-4.
36. Obata, Y.; Takayama, K.; Maitani, Y.; Machida, Y.; Nagai, T. Effect of ethanol on skin permeation of nonionized and ionized diclofenac. *International Journal of Pharmaceutics* **1993**, *89*, 191-198, doi:10.1016/0378-5173(93)90243-9.
37. Gowramma, B.; Rajan, S.; Muralidharan, S.; Meyyanathan, S.N.; Suresh, B. A validated RP-HPLC method for simultaneous estimation of paracetamol and diclofenac potassium in pharmaceutical formulation. *International Journal of ChemTech Research* **2010**, *2*, 676-680.
38. Karadzovska, D.; Riviere, J.E. Assessing vehicle effects on skin absorption using artificial membrane assays. *European Journal of Pharmaceutical Sciences* **2013**, *50*, 569-576, doi:https://doi.org/10.1016/j.ejps.2013.02.020.
39. Sznitowska, M.; Stokrocka, M. Determination of diclofenac released from suppositories using UV spectrophotometry, spectra derivative spectrophotometry and HPLC. *Acta Pol Pharm* **2007**, *64*, 401-405.
40. Kasperek, R. Determination of diclofenac sodium and papaverine hydrochloride in tablets by HPLC method. *Acta Pol Pharm* **2008**, *65*, 403-408.
41. Kaphalia, L.; Kaphalia, B.S.; Kumar, S.; Kanz, M.F.; Treinen-Moslen, M. Efficient high performance liquid chromatograph/ultraviolet method for determination of diclofenac and 4'-hydroxydiclofenac in rat serum. *J Chromatogr B Analyt Technol Biomed Life Sci* **2006**, *830*, 231-237, doi:10.1016/j.jchromb.2005.10.045.
42. Hamed, R.; Basil, M.; AlBaraghthi, T.; Sunoqrot, S.; Tarawneh, O. Nanoemulsion-based gel formulation of diclofenac diethylamine: design, optimization, rheological behavior and in vitro diffusion studies. *Pharm Dev Technol* **2016**, *21*, 980-989, doi:10.3109/10837450.2015.1086372.
43. Wongpayapkul, L.; Leesawat, P.; Rittirod, T.; Klangtrakul, K.; Pongpaibul, Y. Adhesive Property, in vitro Release and Permeation Studies of Ketoprofen Transdermal Drug Delivery Systems. *CMU. Jurnal* **2005**, *4*, 305-314.
44. Proniuk, S.; Lerkpulsawad, S.; Blanchard, J. A simplified and rapid high-performance liquid chromatographic assay for ketoprofen in isopropyl myristate. *J Chromatogr Sci* **1998**, *36*, 495-498, doi:10.1093/chromsci/36.10.495.
45. Salamanca, C.H.; Barrera-Ocampo, A.; Lasso, J.C.; Camacho, N.; Yarcce, C.J. Franz Diffusion Cell Approach for Pre-Formulation Characterisation of Ketoprofen Semi-Solid Dosage Forms. *Pharmaceutics* **2018**, *10*, doi:10.3390/pharmaceutics10030148.

46. Wongpayapakul, L.; Leesawat, P.; Rittirod, T.; Klangtrakul, K.; Pongpaibul, Y. Effect of Single and Combined Permeation Enhancers on the Skin Permeation of Ketoprofen Transdermal Drug Delivery Systems. *CMU. Journal* **2006**, *5*, 41-52.
47. Kim, B.S.; Won, M.; Lee, K.M.; Kim, C.S. In vitro permeation studies of nanoemulsions containing ketoprofen as a model drug. *Drug Deliv* **2008**, *15*, 465-469, doi:10.1080/10717540802328599.
48. Ngawhirunpat, T.; Worachun, N.; Opanasopit, P.; Rojanarata, T.; Panomsuk, S. Cremophor RH40-PEG 400 microemulsions as transdermal drug delivery carrier for ketoprofen. *Pharm Dev Technol* **2013**, *18*, 798-803, doi:10.3109/10837450.2011.627871.
49. Farinha, A.; Toscano, C.; Campos, R.; Bica, A.; Hadgraft, J. Permeation of naproxen from saturated solutions and commercial formulations through synthetic membranes. *Drug Dev Ind Pharm* **2003**, *29*, 489-494, doi:10.1081/ddc-120018383.
50. Panda, S.S.; Bera, V.R.K.; Kumari, A. Ultrafast Liquid Chromatographic Determination of Naproxen Sodium in Pharmaceutical Dosage Form. *Columbia Int. Publ. Am. J. Mod. Chromatogr.* **2015**, *2*, 16-25.
51. Moghimipour, E.; Salimi, A.; Eftekhari, S. Design and characterization of microemulsion systems for naproxen. *Adv Pharm Bull* **2013**, *3*, 63-71, doi:10.5681/apb.2013.011.
52. Akbari, J.; Saeedi, M.; Morteza-Semnani, K.; Rostamkalei, S.S.; Asadi, M.; Asare-Addo, K.; Nokhodchi, A. The design of naproxen solid lipid nanoparticles to target skin layers. *Colloids Surf B Biointerfaces* **2016**, *145*, 626-633, doi:10.1016/j.colsurfb.2016.05.064.
53. Montenegro, L.; Carbone, C.; Condorelli, G.; Drago, R.; Puglisi, G. Effect of oil phase lipophilicity on in vitro drug release from o/w microemulsions with low surfactant content. *Drug Dev Ind Pharm* **2006**, *32*, 539-548, doi:10.1080/03639040600599806.
54. Aravind, M.K.; Miceli, J.N.; Kauffman, R.E. Determination of ibuprofen by high-performance liquid chromatography. *J Chromatogr* **1984**, *308*, 350-353, doi:10.1016/s0021-9673(01)87566-x.
55. Haikala, V.E.; Heimonen, I.K.; Vuorela, H.J. Determination of ibuprofen in ointments by reversed-phase liquid chromatography. *J Pharm Sci* **1991**, *80*, 456-458, doi:10.1002/jps.2600800512.
56. Rasool, B.K.A.; Abu-Gharbieh, E.; Fahmy, S.; Saad, H.; Khan, S. Development and evaluation of ibuprofen transdermal gel formulations. *Trop J Pharm Res* **2010**, *9*, 355-363, doi:10.4314/tjpr.v9i4.58928.
57. Abioye, A.O.; Issah, S.; Kola-Mustapha, A.T. Ex vivo skin permeation and retention studies on chitosan-ibuprofen-gellan ternary nanogel prepared by in situ ionic gelation technique--a tool for controlled transdermal delivery of ibuprofen. *Int J Pharm* **2015**, *490*, 112-130, doi:10.1016/j.ijpharm.2015.05.030.
58. Herkenne, C.; Naik, A.; Kalia, Y.N.; Hadgraft, J.; Guy, R.H. Ibuprofen transport into and through skin from topical formulations: in vitro-in vivo comparison. *J Invest Dermatol* **2007**, *127*, 135-142, doi:10.1038/sj.jid.5700491.
59. Chen, H.; Chang, X.; Du, D.; Li, J.; Xu, H.; Yang, X. Microemulsion-based hydrogel formulation of ibuprofen for topical delivery. *Int J Pharm* **2006**, *315*, 52-58, doi:10.1016/j.ijpharm.2006.02.015.
60. Ravisankar, S.; Vasudevan, M.; Gandhimathi, M.; Suresh, B. Reversed-phase HPLC method for the estimation of acetaminophen, ibuprofen and chlorzoxazone in formulations. *Talanta* **1998**, *46*, 1577-1581, doi:10.1016/s0039-9140(98)00043-5.
61. Hadgraft, J.; Whitefield, M.; Rosher, P.H. Skin penetration of topical formulations of ibuprofen 5%: an in vitro comparative study. *Skin pharmacology and applied skin physiology* **2003**, *16*, 137-142, doi:10.1159/000069759.
62. Godwin, D.A.; Wiley, C.J.; Felton, L.A. Using cyclodextrin complexation to enhance secondary photoprotection of topically applied ibuprofen. *Eur J Pharm Biopharm* **2006**, *62*, 85-93, doi:10.1016/j.ejpb.2005.06.002.
63. Peraman, R.; Nayakanti, D.; Dugga, H.H.; Kodikonda, S. Development and Validation of a Stability-Indicating Assay of Etofenamate by RP-HPLC and Characterization of Degradation Products. *Sci Pharm* **2013**, *81*, 1017-1028, doi:10.3797/scipharm.1305-19.
64. Dannhardt, G.; Laufer, S.; Lehr, M. HPLC determination of etofenamate and flufenamic acid in biological material. *Clin Chem* **1988**, *34*, 2580-2581.
65. Marto, J.; Baltazar, D.; Duarte, A.; Fernandes, A.; Gouveia, L.; Militao, M.; Salgado, A.; Simoes, S.; Oliveira, E.; Ribeiro, H.M. Topical gels of etofenamate: in vitro and in vivo evaluation. *Pharm Dev Technol* **2015**, *20*, 710-715, doi:10.3109/10837450.2014.915571.
